# Supplementary material for: Blue pigmentation of neustonic copepods benefits exploitation of a prey-rich niche at the air-sea boundary
Source: PubMed Central journal article supplement (PMC6068160; doi:10.1038/s41598-018-29869-7), 2018-07-31
Supplement: 41598_2018_29869_MOESM1_ESM.pdf [file 41598_2018_29869_MOESM1_ESM.pdf]

## Supplementary Material

### Blue pigmentation of neustonic copepods benefits exploitation of a prey-rich niche at the air-sea boundary

Janina Rahlff<sup>1\*</sup>, Mariana Ribas-Ribas<sup>1\*</sup>, Scott M. Brown<sup>2</sup>, Nur Ili Hamizah Mustaffa<sup>1</sup>, Jasmin Renz<sup>3</sup>, Myron A. Peck<sup>4</sup>, Kimberley Bird<sup>5</sup>, Michael Cunliffe<sup>5</sup>, Katharina Melkonian<sup>1</sup>, Christopher J. Zappa<sup>2</sup>

<sup>1</sup>Institute for Chemistry and Biology of the Marine Environment (ICBM), Carl von Ossietzky University Oldenburg, Schleusenstraße 1, 26382, Wilhelmshaven, Germany

<sup>2</sup>Lamont-Doherty Earth Observatory, Columbia University, Palisades, New York, 10964, USA

<sup>3</sup>Forschungsinstitut Senckenberg, German Centre for Marine Biodiversity Research (DZMB), Martin-Luther-King Platz 3, 20146 Hamburg, Germany

<sup>4</sup>Center for Earth System Research and Sustainability (CEN), University of Hamburg, Olbersweg 24, 22767 Hamburg, Germany

<sup>5</sup>Marine Biological Association of the United Kingdom, Plymouth PL1 2PB, UK

\*Corresponding authors:

<[Janina.rahlff@uni-due.de](mailto:Janina.rahlff@uni-due.de)>, Present address: Group for Aquatic Microbial Ecology (GAME), University of Duisburg-Essen, Campus Essen-Biofilm Centre, Essen, Germany

<[Mariana.ribas.ribas@uni-oldenburg.de](mailto:Mariana.ribas.ribas@uni-oldenburg.de)>

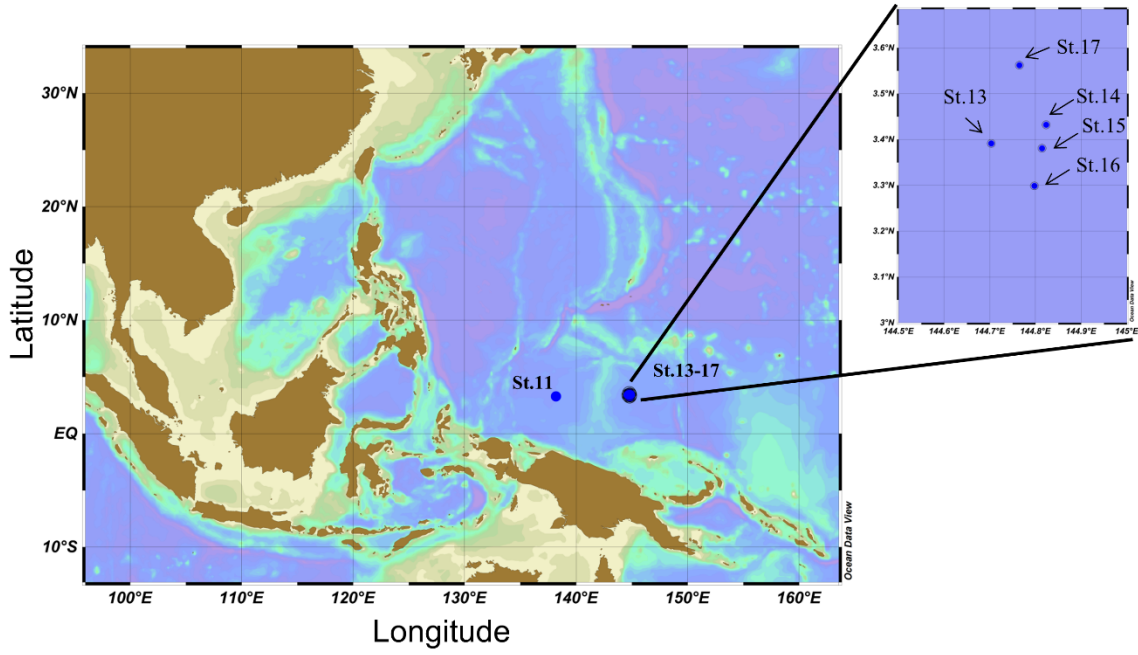

Supplementary Figure S1: Station map for S<sup>3</sup> copepod sampling <sup>1</sup>.

**Supplementary Table S1:** Copepod OTUs found in sea-surface microlayer (SML; min. 10 sequence reads per OTU) of the Pacific Ocean. Samples are derived from manual glass plate sampling. No manual sampling took place at Station 14. BLAST= Basic Local Alignment Search Tool

| Order         | Station | No. of reads in SML  | Phylogenetic affiliation (BLAST) | % identity | % query cover | e value    | Accession number | Family             | OTU#        | Genbank Accession number (this study) |
|---------------|---------|----------------------|----------------------------------|------------|---------------|------------|------------------|--------------------|-------------|---------------------------------------|
| Calanoida     | 11      | 5476                 | <i>Acrocalanus gracilis</i>      | 100%       | 100%          | 0          | JQ911938.1       | Paracalanidae      | SML_OTU#5   | MG811792                              |
|               |         | 221                  | <i>Clausocalanus arcuicornis</i> | 100%       | 100%          | 0          | HM997079.1       | Clausocalanidae    | SML_OTU#96  | MG811798                              |
|               | 13      | 3638                 | <i>Anomalocera patersoni</i>     | 97%        | 100%          | 0          | JX995305.1       | Pontellidae        | SML_OTU#22  | MG811795                              |
|               |         | 742                  | <i>Pontella fera</i>             | 100%       | 100%          | 0          | GU969189.1       | Pontellidae        | SML_OTU#33  | MG811796                              |
|               | 15      | 1290                 | <i>Delibus</i> sp.               | 99%        | 100%          | 0          | JQ911952.1       | Paracalanidae      | SML_OTU#14  | MG811793                              |
|               |         | 131                  | <i>Lucicutia flavicornis</i>     | 100%       | 100%          | 0          | HM997055.1       | Lucicutiidae       | SML_OTU#228 | MG811801                              |
| 17            | 896     | <i>Pontella fera</i> | 100%                             | 100%       | 0             | GU969189.1 | Pontellidae      | SML_OTU#33         | MG811796    |                                       |
| Cyclopoida    | 11      | 11                   | <i>Cyclopina</i> sp.             | 95%        | 100%          | 2E-172     | MF077741.1       | Cyclopinidae       | SML_OTU#18  | MG811794                              |
|               | 13      | 361                  | <i>Corycaeus speciosus</i>       | 100%       | 100%          | 0          | GU969165.1       | Corycaeidae        | SML_OTU#64  | MG811797                              |
|               | 16      | 289                  | <i>Corycaeus speciosus</i>       | 100%       | 100%          | 0          | GU969165.1       | Corycaeidae        | SML_OTU#64  | MG811797                              |
|               |         | 16                   | <i>Anthessius</i> sp.            | 95%        | 100%          | 3E-169     | AY627002.1       | Anthessiidae       | SML_OTU#937 | MG811802                              |
| Harpacticoida | 17      | 175                  | <i>Miracia efferata</i>          | 99%        | 100%          | 0          | EU380294.1       | Miraciidae         | SML_OTU#103 | MG811799                              |
|               |         | 53                   | <i>Superornatiremidae</i> sp.    | 85%        | 100%          | 1E-117     | MF077702.1       | Superornatiremidae | SML_OTU#215 | MG811800                              |

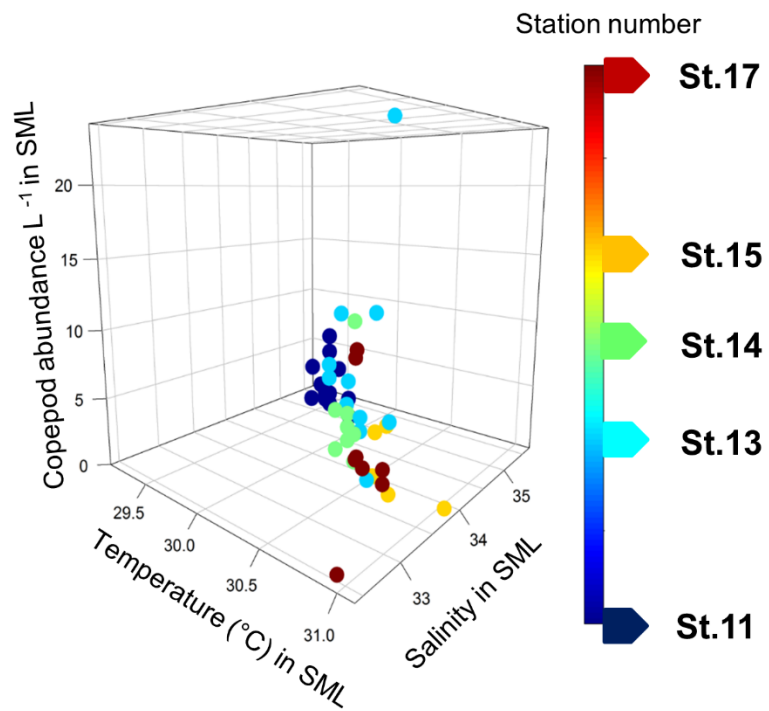

**Supplementary Figure S2:** Abundance of pontellid copepods in the sea-surface microlayer (SML) versus salinity and temperature of the SML.

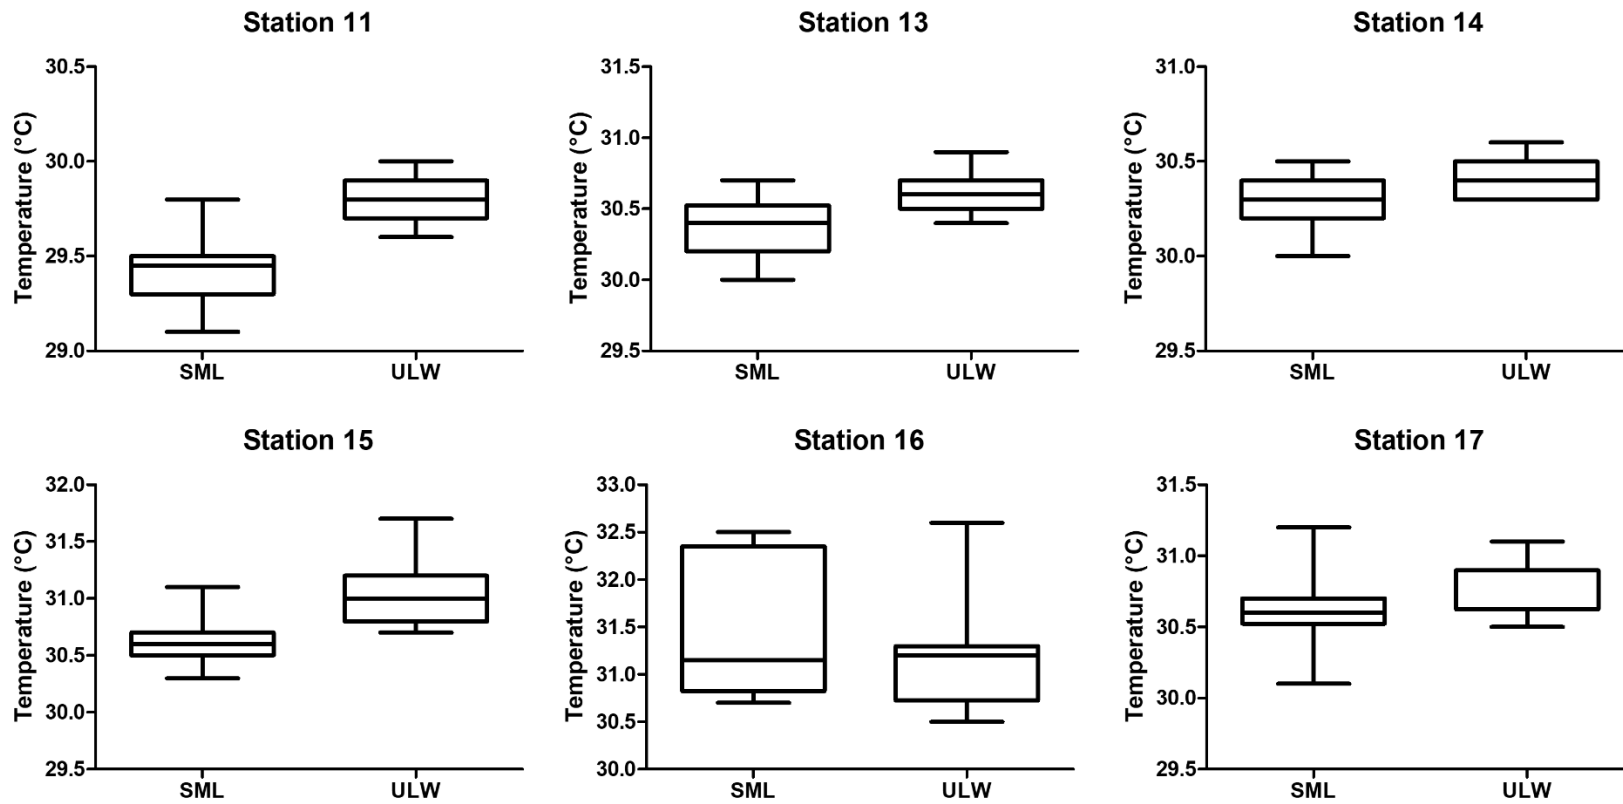

**Supplementary Figure S3a:** Comparison of SML and ULW temperature for stations 11 and 13-17. Whiskers indicate min. to max. values

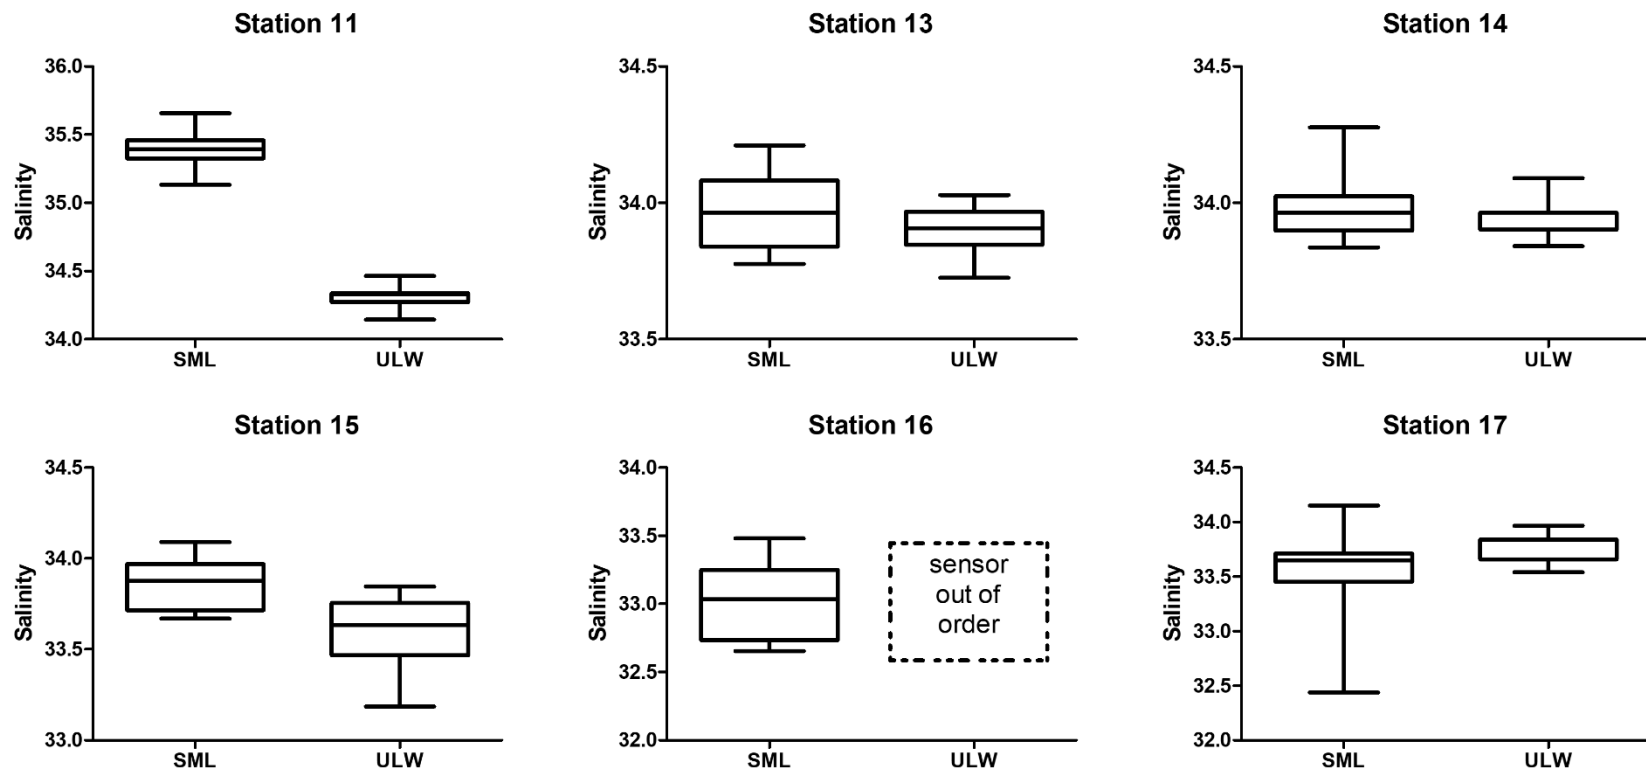

**Supplementary Figure S3b:** SML and ULW salinity for stations 11 and 13-17. ULW salinity for station 16 is missing due to sensor issues. Whiskers indicate min. to max. values.



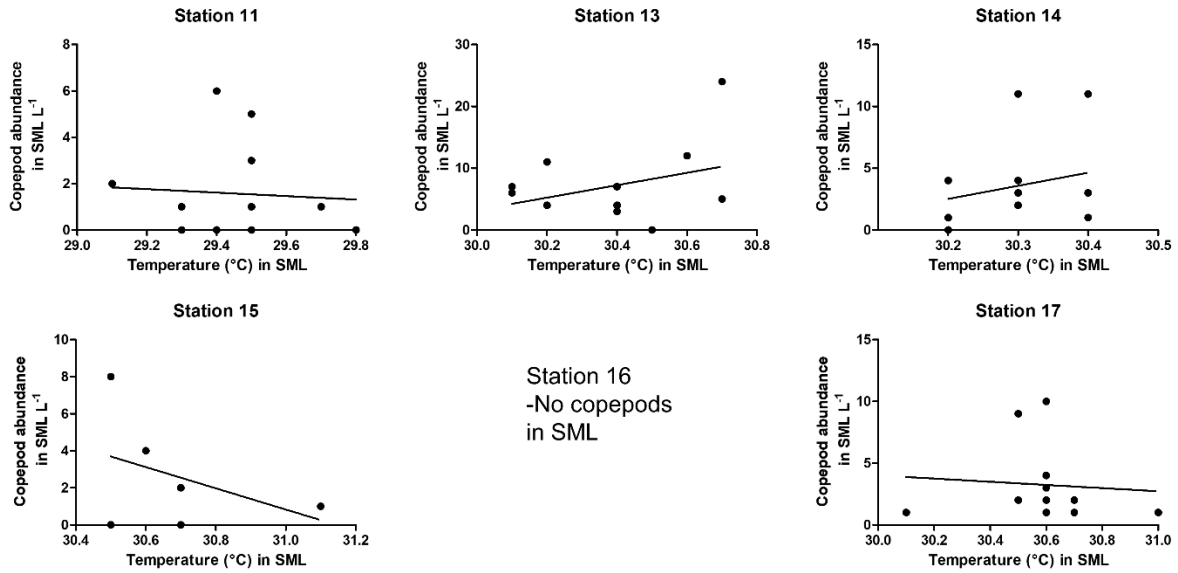

Supplementary Figure S4a: Relation of neustonic copepod abundance and temperature in SML.

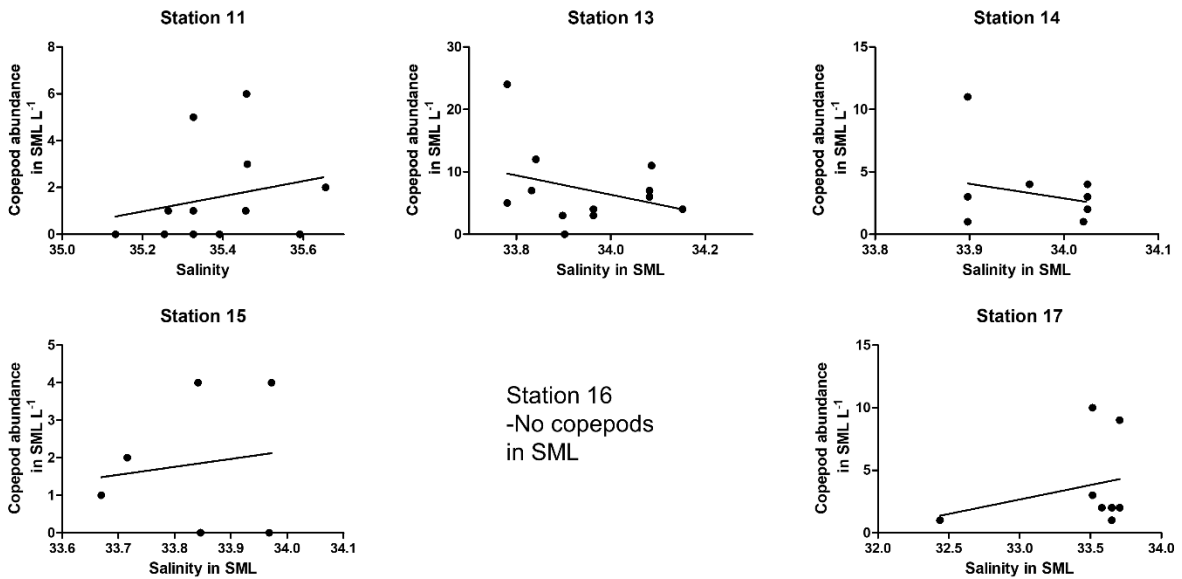

Supplementary Figure S4b: Relation of neustonic copepod abundance and salinity in SML.



**Supplementary Table S3:** Results from Spearman rank correlation for copepod abundance in the SML versus temperature and salinity. n.d.=not determined, n.s.=not significant

| <b>Station number</b>                            |                    | <b>11</b> | <b>13</b> | <b>14</b> | <b>15</b> | <b>17</b> |
|--------------------------------------------------|--------------------|-----------|-----------|-----------|-----------|-----------|
| <b>Temperature (vs copepod abundance in SML)</b> | Number of XY Pairs | 12        | 12        | 12        | 7         | 12        |
|                                                  | Spearman r         | 0         | 0.07195   | 0.1308    | -0.3552   | -0.2618   |
|                                                  | p-value            | 1         | 0.8241    | 0.6853    | 0.4344    | 0.4111    |
|                                                  | Significance       | n.s.      | n.s.      | n.s.      | n.s.      | n.s.      |
| <b>Salinity (vs copepod abundance in SML)</b>    | Number of XY Pairs | 12        | 12        | 9         | 6         | 8         |
|                                                  | Spearman r         | 0.3973    | -0.1996   | 0.1228    | 0.02942   | 0.08126   |
|                                                  | p-value            | 0.2009    | 0.5339    | 0.7529    | 0.9959    | 0.8483    |
|                                                  | Significance       | n.s.      | n.s.      | n.s.      | n.s.      | n.s.      |

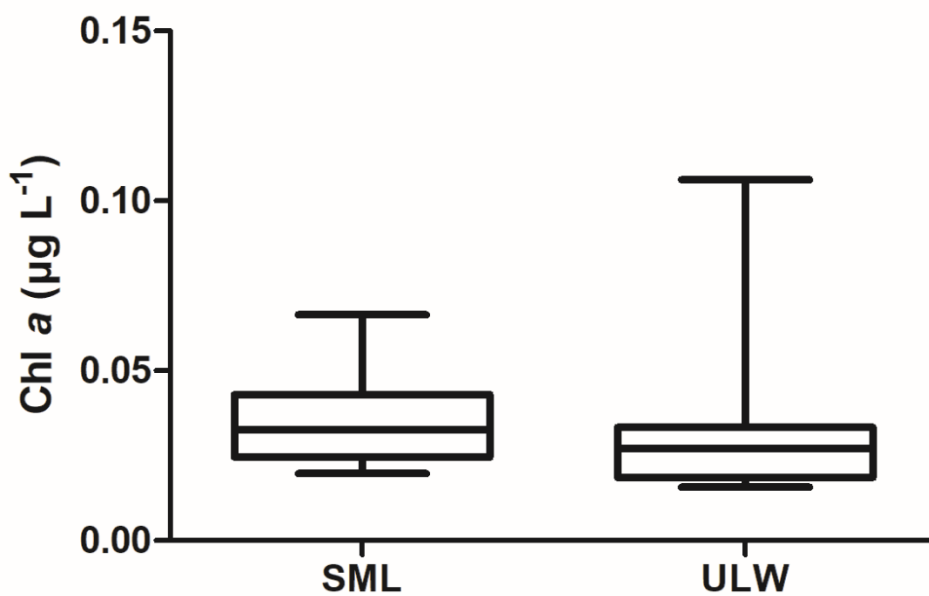

**Supplementary Figure S5:** Comparison of chlorophyll a concentration ( $\mu\text{g L}^{-1}$ ) in SML and ULW

**Supplementary Table S4:** Statistics for chlorophyll a concentration differences in SML and ULW as determined by Mann-Whitney U-test. Whiskers represent min. and max.

|                                   |                        |        |
|-----------------------------------|------------------------|--------|
| <b>Chlorophyll a (SML vs ULW)</b> | Number of observations | 17     |
|                                   | Mann-Whitney U value   | 103    |
|                                   | p-value                | 0.1579 |
|                                   | Significance           | n.s.   |

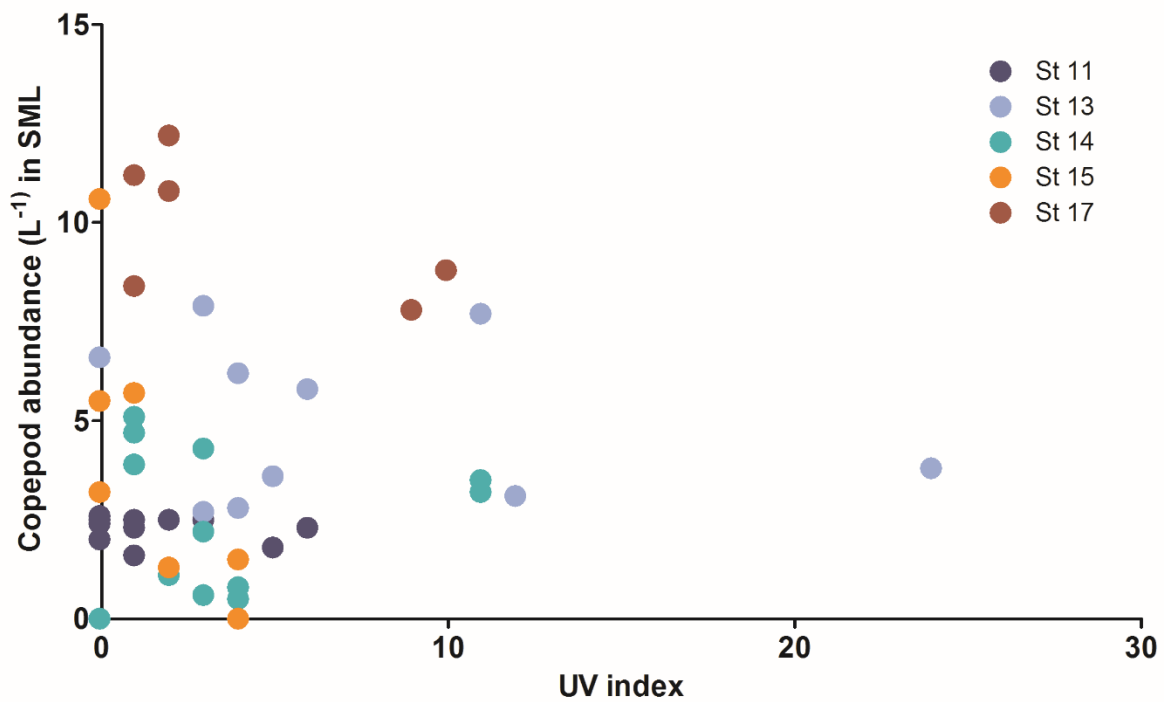

**Supplementary Figure S6:** Abundance of pontellid copepods (L<sup>-1</sup>) in the sea-surface microlayer (SML) in relation to ultraviolet (UV) index for different stations.

**Supplementary Table S5:** Sample volumes of SML and ULW (containing copepods)

| <b>S<sup>3</sup> sampled volumes (L)</b> |            |            |
|------------------------------------------|------------|------------|
| <b>Station</b>                           | <b>SML</b> | <b>ULW</b> |
| 11                                       | 12         | 12         |
| 13                                       | 12         | 10         |
| 14                                       | 12         | 11         |
| 15                                       | 8          | 7          |
| 16                                       | 12         | 12         |
| 17                                       | 12         | 12         |

**Supplementary Table S6:** Species composition of pontellid subsamples

| <b>Station</b> | <b><i>Pontella fera</i> (%)</b> | <b><i>Ivellopsiis denticauda</i> (%)</b> | <b>unidentified (%)</b> |
|----------------|---------------------------------|------------------------------------------|-------------------------|
| 11             | 0                               | 44.4                                     | 55.6                    |
| 13             | 33.7                            | 0                                        | 66.3                    |
| 14             | 29.5                            | 0                                        | 70.5                    |
| 15             | n.d.                            | n.d.                                     | 100.0                   |
| 16             | n.d.                            | n.d.                                     | 100.0                   |
| 17             | 38.5                            | 0                                        | 61.5                    |

References:

- 1 Schlitzer, R. (<https://odv.awi.de/> (accessed 24.10.2017), 2009).
